# Supplementary material
Source: ML conference proceedings conference paper supplement (https://proceedings.neurips.cc/paper_files/paper/2019/hash/d073bb8d0c47f317dd39de9c9f004e9d-Abstract.html)
Supplement: Supplementary file [file d073bb8d0c47f317dd39de9c9f004e9d-Supplemental.zip]

---

# Learning step sizes for unfolded sparse coding

---

Anonymous Author(s)

Affiliation

Address

email

## Abstract

1 Sparse coding is typically solved by iterative optimization techniques, such as  
2 the Iterative Shrinkage-Thresholding Algorithm (ISTA). Unfolding and learning  
3 weights of ISTA using neural networks is a practical way to accelerate estimation.  
4 In this paper, we study the selection of adapted step sizes for ISTA. We show  
5 that a simple step size strategy can improve the convergence rate of ISTA by  
6 leveraging the sparsity of the iterates. However, it is impractical in most large-  
7 scale applications. Therefore, we propose a network architecture where only the  
8 step sizes of ISTA are learned. We demonstrate that for a large class of unfolded  
9 algorithms, if the algorithm converges to the solution of the Lasso, its last layers  
10 correspond to ISTA with learned step sizes. Experiments show that our method is  
11 competitive with state-of-the-art networks when the solutions are sparse enough.

## 1 Introduction

13 The resolution of convex optimization problems by iterative algorithms has become a key part of  
14 machine learning and signal processing pipelines. Amongst these problems, special attention has  
15 been devoted to the Lasso (Tibshirani, 1996), due to the attractive sparsity properties of its solution  
16 (see Hastie et al. 2015 for an extensive review). For a given input  $x \in \mathbb{R}^n$ , a dictionary  $D \in \mathbb{R}^{n \times m}$   
17 and a regularization parameter  $\lambda > 0$ , the Lasso problem is

$$z^*(x) \in \arg \min_{z \in \mathbb{R}^m} F_x(z) \quad \text{with} \quad F_x(z) \triangleq \frac{1}{2} \|x - Dz\|^2 + \lambda \|z\|_1. \quad (1)$$

18 A variety of algorithms exist to solve Problem (1), *e.g.* proximal coordinate descent  
19 (Tseng, 2001; Friedman et al., 2007), Least Angle Regression (Efron et al., 2004) or proximal  
20 splitting methods (Combettes and Bauschke, 2011). The focus of this paper is on the Iterative  
21 Shrinkage-Thresholding Algorithm (ISTA, Daubechies et al. 2004), which is a proximal-gradient  
22 method applied to Problem (1). ISTA starts from  $z^{(0)} = 0$  and iterates

$$z^{(t+1)} = \text{ST} \left( z^{(t)} - \frac{1}{L} D^\top (Dz^{(t)} - x), \frac{\lambda}{L} \right), \quad (2)$$

23 where ST is the soft-thresholding operator defined as  $\text{ST}(x, u) \triangleq \text{sign}(x) \max(|x| - u, 0)$ , and  $L$   
24 is the greatest eigenvalue of  $D^\top D$ . In the general case, ISTA converges at rate  $1/t$ , which can be  
25 improved to the *optimal* rate  $1/t^2$  (Nesterov, 1983). However, this optimality stands in the worst  
26 possible case, and linear rates are achievable in practice (Liang et al., 2014).

27 A popular line of research to improve the speed of Lasso solvers is to try to identify the support  
28 of  $z^*$ , in order to diminish the size of the optimization problem (El Ghaoui et al., 2012; Ndiaye  
29 et al., 2017; Johnson and Guestrin, 2015; Massias et al., 2018). Once the support is identified, larger  
30 steps can also be taken, leading to improved rates for first order algorithms (Liang et al., 2014; Poon  
31 et al., 2018; Sun et al., 2019).

However, these techniques only consider the case where a single Lasso problem is solved. When one wants to solve the Lasso for many samples  $\{x^i\}_{i=1}^N$  – e.g. in dictionary learning (Olshausen and Field, 1997) – it is proposed by Gregor and Le Cun (2010) to learn a  $T$ -layers neural network of parameters  $\Theta, \Phi_\Theta : \mathbb{R}^n \rightarrow \mathbb{R}^m$  such that  $\Phi_\Theta(x) \simeq z^*(x)$ . This Learned-ISTA (LISTA) algorithm yields better solution estimates than ISTA on new samples for the same number of iterations/layers. This idea has led to a profusion of literature (summarized in Table A.1 in appendix). Recently, it has been hinted by Zhang and Ghanem (2018); Ito et al. (2018); Liu et al. (2019) that only a few well-chosen parameters can be learned while retaining the performances of LISTA.

In this article, we study strategies for LISTA where only step sizes are learned. In Section 3, we propose Oracle-ISTA, an analytic strategy to obtain larger step sizes in ISTA. We show that the proposed algorithm’s convergence rate can be much better than that of ISTA. However, it requires computing a large number of Lipschitz constants which is a burden in high dimension. This motivates the introduction of Step-LISTA (SLISTA) networks in Section 4, where only a step size parameter is learned per layer. As a theoretical justification, we show in Theorem 4.4 that the last layers of *any* deep LISTA network converging on the Lasso *must* correspond to ISTA iterations with learned step sizes. We validate the soundness of this approach with numerical experiments in Section 5.

## 2 Notation and Framework

**Notation** The  $\ell_2$  norm on  $\mathbb{R}^n$  is  $\|\cdot\|$ . For  $p \in [1, \infty]$ ,  $\|\cdot\|_p$  is the  $\ell_p$  norm. The Frobenius matrix norm is  $\|M\|_F$ . The identity matrix of size  $m$  is  $\text{Id}_m$ . ST is the soft-thresholding operator. Iterations are denoted  $z^{(t)}$ .  $\lambda > 0$  is the regularization parameter. The Lasso cost function is  $F_x$ .  $\psi_\alpha(z, x)$  is one iteration of ISTA with step  $\alpha$ :  $\psi_\alpha(z, x) = \text{ST}(z - \alpha D^\top(Dz - x), \alpha\lambda)$ .  $\phi_\theta(z, x)$  is one iteration of a LISTA layer with parameters  $\theta = (W, \alpha, \beta)$ :  $\phi_\theta(z, x) = \text{ST}(z - \alpha W^\top(Dz - x), \beta\lambda)$ .

The set of integers between 1 and  $m$  is  $\llbracket 1, m \rrbracket$ . Given  $z \in \mathbb{R}^m$ , the support is  $\text{supp}(z) = \{j \in \llbracket 1, m \rrbracket : z_j \neq 0\} \subset \llbracket 1, m \rrbracket$ . For  $S \subset \llbracket 0, m \rrbracket$ ,  $D_S \in \mathbb{R}^{n \times m}$  is the matrix containing the columns of  $D$  indexed by  $S$ . We denote  $L_S$ , the greatest eigenvalue of  $D_S^\top D_S$ . The equicorrelation set is  $E = \{j \in \llbracket 1, m \rrbracket : |D_j^\top(Dz^* - x)| = \lambda\}$ . The equiregularization set is  $\mathcal{B}_\infty = \{x \in \mathbb{R}^n : \|D^\top x\|_\infty = 1\}$ . Neural networks parameters are between brackets, e.g.  $\Theta = \{\alpha^{(t)}, \beta^{(t)}\}_{t=0}^{T-1}$ . The sign function is  $\text{sign}(x) = 1$  if  $x > 0$ ,  $-1$  if  $x < 0$  and  $0$  if  $x = 0$ .

**Framework** This paragraph recalls some properties of the Lasso. Lemma 2.1 gives the first-order optimality conditions for the Lasso.

**Lemma 2.1** (Optimality for the Lasso). *The Karush-Kuhn-Tucker (KKT) conditions read*

$$z^* \in \arg \min F_x \Leftrightarrow \forall j \in \llbracket 1, m \rrbracket, D_j^\top(x - Dz^*) \in \lambda \partial |z_j^*| = \begin{cases} \{\lambda \text{sign } z_j^*\}, & \text{if } z_j^* \neq 0, \\ [-\lambda, \lambda], & \text{if } z_j^* = 0. \end{cases} \quad (3)$$

Defining  $\lambda_{\max} \triangleq \|D^\top x\|_\infty$ , it holds  $\arg \min F_x = \{0\} \Leftrightarrow \lambda \geq \lambda_{\max}$ . For some results in Section 3, we will need the following assumption on the dictionary  $D$ :

**Assumption 2.2** (Uniqueness assumption).  *$D$  is such that the solution of Problem (1) is unique for all  $\lambda$  and  $x$  i.e.  $\arg \min F_x = \{z^*\}$ .*

Assumption 2.2 may seem stringent since whenever  $m > n$ ,  $F_x$  is not strictly convex. However, it was shown in Tibshirani (2013, Lemma 4) – with earlier results from Rosset et al. 2004 – that if  $D$  is sampled from a continuous distribution, Assumption 2.2 holds for  $D$  with probability one.

**Definition 2.3** (Equicorrelation set). *The KKT conditions motivate the introduction of the equicorrelation set  $E \triangleq \{j \in \llbracket 1, m \rrbracket : |D_j^\top(Dz^* - x)| = \lambda\}$ , since  $j \notin E \implies z_j^* = 0$ , i.e.  $E$  contains the support of any solution  $z^*$ .*

When Assumption 2.2 holds, we have  $E = \text{supp}(z^*)$  (Tibshirani, 2013, Lemma 16).

We consider samples  $x$  in the equiregularization set

$$\mathcal{B}_\infty \triangleq \{x \in \mathbb{R}^n : \|D^\top x\|_\infty = 1\}, \quad (4)$$

which is the set of  $x$  such that  $\lambda_{\max}(x) = 1$ . Therefore, when  $\lambda \geq 1$ , the solution is  $z^*(x) = 0$  for all  $x \in \mathcal{B}_\infty$ , and when  $\lambda < 1$ ,  $z^*(x) \neq 0$  for all  $x \in \mathcal{B}_\infty$ . For this reason, we assume  $0 < \lambda < 1$  in the following.

### 78 3 Better step sizes for ISTA

79 The Lasso objective is the sum of a  $L$ -smooth function,  $\frac{1}{2}\|x - D \cdot\|^2$ , and a function with an explicit  
80 proximal operator,  $\lambda\|\cdot\|_1$ . Proximal gradient descent for this problem, with the sequence of step  
81 sizes  $(\alpha^{(t)})$  consists in iterating

$$z^{(t+1)} = \text{ST} \left( z^{(t)} - \alpha^{(t)} D^\top (D z^{(t)} - x), \lambda \alpha^{(t)} \right) . \quad (5)$$

82 ISTA follows these iterations with a constant step size  $\alpha^{(t)} = 1/L$ . In the following, denote  
83  $\psi_\alpha(z, x) \triangleq \text{ST}(z - \alpha D^\top (D z^{(t)} - x), \alpha \lambda)$ . One iteration of ISTA can be cast as a majorization-  
84 minimization step (Beck and Teboulle, 2009). Indeed, for all  $z \in \mathbb{R}^m$ ,

$$F_x(z) = \frac{1}{2}\|x - D z^{(t)}\|^2 + (z - z^{(t)})^\top D^\top (D z^{(t)} - x) + \frac{1}{2}\|D(z - z^{(t)})\|^2 + \lambda\|z\|_1 \quad (6)$$

$$\leq \underbrace{\frac{1}{2}\|x - D z^{(t)}\|^2 + (z - z^{(t)})^\top D^\top (D z^{(t)} - x) + \frac{L}{2}\|z - z^{(t)}\|^2 + \lambda\|z\|_1}_{\triangleq Q_{x,L}(z, z^{(t)})} , \quad (7)$$

85 where we have used the inequality  $(z - z^{(t)})^\top D^\top D(z - z^{(t)}) \leq L\|z - z^{(t)}\|^2$ . The minimizer of  
86  $Q_{x,L}(\cdot, z^{(t)})$  is  $\psi_{1/L}(z^{(t)}, x)$ , which is the next ISTA step.

87 **Oracle-ISTA: an accelerated ISTA with larger step sizes** Since the iterates are sparse, this  
88 approach can be refined. For  $S \subset \llbracket 1, m \rrbracket$ , let us define the  $S$ -smoothness of  $D$  as

$$L_S \triangleq \max_z z^\top D^\top D z, \text{ s.t. } \|z\| = 1 \text{ and } \text{supp}(z) \subset S , \quad (8)$$

89 with the convention  $L_\emptyset = L$ . Note that  $L_S$  is the greatest eigenvalue of  $D_S^\top D_S$  where  $D_S \in \mathbb{R}^{n \times |S|}$   
90 is the columns of  $D$  indexed by  $S$ . For all  $S$ ,  $L_S \leq L$ , since  $L$  is the solution of Equation (8)  
91 without support constraint. Assume  $\text{supp}(z^{(t)}) \subset S$ . Combining Equations (6) and (8), we have

$$\forall z \text{ s.t. } \text{supp}(z) \subset S, \quad F_x(z) \leq Q_{x,L_S}(z, z^{(t)}) . \quad (9)$$

92 The minimizer of the r.h.s is  $z = \psi_{1/L_S}(z^{(t)}, x)$ . Furthermore, the r.h.s. is a tighter upper bound than  
93 the one given in Equation (7) (see illustration in Figure 1). Therefore, using  $z^{(t+1)} = \psi_{1/L_S}(z^{(t)}, x)$   
94 minimizes a tighter upper bound, provided that the following condition holds

$$\text{supp}(z^{(t+1)}) \subset S . \quad (\star)$$

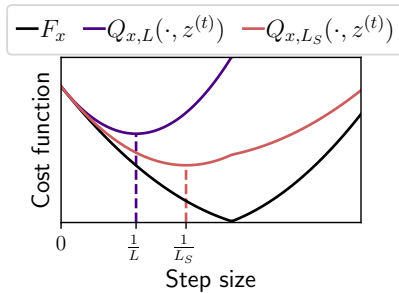

Figure 1: Majorization illustration. If  $z^{(t)}$  has support  $S$ ,  $Q_{x,L_S}(\cdot, z^{(t)})$  is a tighter upper bound of  $F_x$  than  $Q_{x,L}(\cdot, z^{(t)})$  on the set of points of support  $S$ .

95 Oracle-ISTA (OISTA) is an accelerated version of ISTA which leverages the sparsity of the iterates  
96 in order to use larger step sizes. The method is summarized in Algorithm 1. OISTA computes  
97  $y^{(t+1)} = \psi_{1/L_S}(z^{(t)}, x)$ , using the larger step size  $1/L_S$ , and checks if it satisfies the support  
98 Condition  $\star$ . When the condition is satisfied, the step can be safely accepted. In particular Equation (9)  
99 yields  $F_x(y^{(t+1)}) \leq F_x(z^{(t)})$ . Otherwise, the algorithm falls back to the regular ISTA iteration  
100 with the smaller step size. Hence, each iteration of the algorithm is guaranteed to decrease  $F_x$ . The  
101 following proposition shows that OISTA converges in iterates, achieves finite support identification,  
102 and eventually reaches a safe regime where Condition  $\star$  is always true.

---

**Algorithm 1:** Oracle-ISTA (OISTA) with larger step sizes

---

**Input:** Dictionary  $D$ , target  $x$ , number of iterations  $T$   
 $z^{(0)} = 0$   
**for**  $t = 0, \dots, T - 1$  **do**  
    Compute  $S = \text{supp}(z^{(t)})$  and  $L_S$  using an oracle ;  
    Set  $y^{(t+1)} = \psi_{1/L_S}(z^{(t)}, x)$  ;  
    **if** *Condition  $\star$* :  $\text{supp}(y^{(t+1)}) \subset S$  **then** Set  $z^{(t+1)} = y^{(t+1)}$  ;  
    **else** Set  $z^{(t+1)} = \psi_{1/L}(z^{(t)}, x)$  ;  
**Output:** Sparse code  $z^{(T)}$

---

103 **Proposition 3.1** (Convergence, finite-time support identification and safe regime). *When [Assump-](#)*  
104 *tion 2.2 holds, the sequence  $(z^{(t)})$  generated by the algorithm converges to  $z^* = \arg \min F_x$ .*

105 *Further, there exists an iteration  $T^*$  such that for  $t \geq T^*$ ,  $\text{supp}(z^{(t)}) = \text{supp}(z^*) \triangleq S^*$  and*  
106 *[Condition  \$\star\$](#)  is always satisfied.*

107 *Sketch of proof (full proof in [Subsection B.1](#)). Using Zangwill's global convergence theorem ([Zang-](#)*  
108 *will, 1969*), we show that all accumulation points of  $(z^{(t)})$  are solutions of Lasso. Since the solution  
109 is assumed unique,  $(z^{(t)})$  converges to  $z^*$ . Then, we show that the algorithm achieves finite-support  
110 identification with a technique inspired by [Hale et al. \(2008\)](#). The algorithm gets arbitrary close  
111 to  $z^*$ , eventually with the same support. We finally show that in a neighborhood of  $z^*$ , the set of  
112 points of support  $S^*$  is stable by  $\psi_{1/L_S}(\cdot, x)$ . The algorithm eventually reaches this region, and then  
113 [Condition  \$\star\$](#)  is true.  $\square$

114 It follows that the algorithm enjoys the usual ISTA convergence results replacing  $L$  with  $L_{S^*}$ .

115 **Proposition 3.2** (Rates of convergence). *For  $t > T^*$ ,  $F_x(z^{(t)}) - F_x(z^*) \leq L_{S^*} \frac{\|z^* - z^{(T^*)}\|^2}{2(t - T^*)}$ .*  
116 *If additionally  $\inf_{\|z\|=1} \|D_{S^*} z\|^2 = \mu^* > 0$ , then the convergence rate for  $t \geq T^*$  is*  
117  $F_x(z^{(t)}) - F_x(z^*) \leq (1 - \frac{\mu^*}{L_{S^*}})^{t - T^*} (F_x(z^{(T^*)}) - F_x(z^*))$ .

118 *Sketch of proof (full proof in [Subsection B.2](#)). After iteration  $T^*$ , OISTA is equivalent to ISTA ap-*  
119 *plied on  $F_x(z)$  restricted to  $z \in S^*$ . This function is  $L_{S^*}$ -smooth, and  $\mu^*$ -strongly convex if  $\mu^* > 0$ .*  
120 *Therefore, the classical ISTA rates apply with improved condition number.  $\square$*

121 These two rates are tighter than the usual ISTA rates – in the convex case  $L \frac{\|z^*\|^2}{2t}$  and in the  $\mu$ -strongly  
122 convex case  $(1 - \frac{\mu^*}{L})^t (F_x(0) - F_x(z^*))$  ([Beck and Teboulle, 2009](#)). Finally, the same way ISTA  
123 converges in one iteration when  $D$  is orthogonal ( $D^\top D = \text{Id}_m$ ), OISTA converges in one iteration if  
124  $S^*$  is identified and  $D_{S^*}$  is orthogonal.

125 **Proposition 3.3.** *Assume  $D_{S^*}^\top D_{S^*} = L_{S^*} \text{Id}_{|S^*|}$ . Then,  $z^{(T^*+1)} = z^*$ .*

126 *Proof.* For  $z$  s.t.  $\text{supp}(z) = S^*$ ,  $F_x(z) = Q_{x, L_S}(z, z^{(T^*)})$ . Hence, the OISTA step minimizes  
127  $F_x$ .  $\square$

128 **Quantification of the rates improvement in a Gaussian setting** The following proposition gives  
129 an asymptotic value for  $\frac{L_S}{L}$  in a simple setting.

130 **Proposition 3.4.** *Assume that the entries of  $D \in \mathbb{R}^{n \times m}$  are i.i.d centered Gaussian variables with*  
131 *variance 1. Assume that  $S$  consists of  $k$  integers chosen uniformly at random in  $\llbracket 1, m \rrbracket$ . Assume that*  
132  *$k, m, n \rightarrow +\infty$  with linear ratios  $m/n \rightarrow \gamma$ ,  $k/m \rightarrow \zeta$ . Then*

$$\frac{L_S}{L} \rightarrow \left( \frac{1 + \sqrt{\zeta\gamma}}{1 + \sqrt{\gamma}} \right)^2. \quad (10)$$

This is a direct application of the Marchenko-Pastur law (Marchenko and Pastur, 1967). The law is illustrated on a toy dataset in Figure D.1. In Proposition 3.4,  $\gamma$  is the ratio between the number of atoms and number of dimensions, and the average size of  $S$  is described by  $\zeta \leq 1$ . In an overcomplete setting, we have  $\gamma \gg 1$ , yielding the approximation of Equation (10):  $L_S \simeq \zeta L$ . Therefore, if  $z^*$  is very sparse ( $\zeta \ll 1$ ), the convergence rates of Proposition 3.2 are much better than those of ISTA.

**Example** Figure 2 compares the OISTA, ISTA, and FISTA on a toy problem. The improved rate of convergence of OISTA is illustrated. Further comparisons are displayed in Figure D.2 for different regularization parameters  $\lambda$ . While this demonstrates a much faster rate of convergence, it requires computing several Lipschitz constants  $L_S$ , which is cumbersome in high dimension. This motivates the next section, where we propose to *learn* those steps.

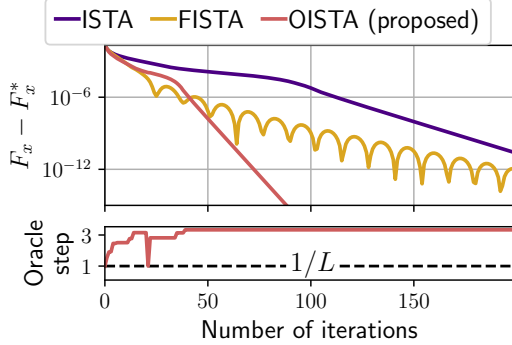

Figure 2: Convergence curves of OISTA, ISTA, and FISTA on a toy problem with  $n = 10$ ,  $m = 50$ ,  $\lambda = 0.5$ . The bottom figure displays the (normalized) steps taken by OISTA at each iteration. Full experimental setup described in Appendix D.

## 4 Learning unfolded algorithms

**Network architectures** At each step, ISTA performs a linear operation to compute an update in the direction of the gradient  $D^\top(Dz^{(t)} - x)$  and then an element-wise non linearity with the soft-thresholding operator  $\text{ST}$ . The whole algorithm can be summarized as a recurrent neural network (RNN), presented in Figure 3a. Gregor and Le Cun (2010) introduced Learned-ISTA (LISTA), a neural network constructed by unfolding this RNN  $T$  times and learning the weights associated to each layer. The unfolded network, presented in Figure 3b, iterates  $z^{(t+1)} = \text{ST}(W_x^{(t)}x + W_z^{(t)}z^{(t)}, \lambda\beta^{(t)})$ . It outputs exactly the same vector as  $T$  iterations of ISTA when  $W_x^{(t)} = \frac{D^\top}{L}$ ,  $W_z^{(t)} = \text{Id}_m - \frac{D^\top D}{L}$  and  $\beta^{(t)} = \frac{1}{L}$ . Empirically, this network is able to output a better estimate of the sparse code solution with fewer operations.

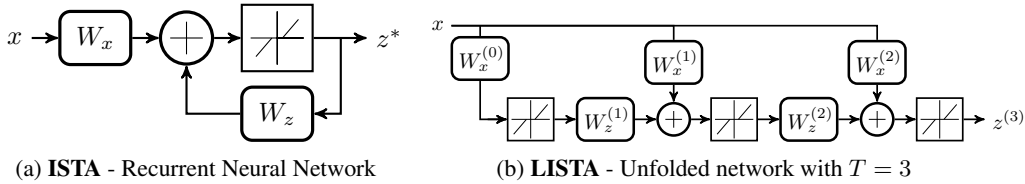

Figure 3: Network architecture for ISTA (left) and LISTA (right).

Due to the expression of the gradient, Chen et al. (2018) proposed to consider only a subclass of the previous networks, where the weights  $W_x$  and  $W_z$  are coupled via  $W_z = \text{Id}_m - W_x^\top D$ . This is the architecture we consider in the following. A layer of LISTA is a function  $\phi_\theta : \mathbb{R}^n \times \mathbb{R}^n \rightarrow \mathbb{R}^m$  parametrized by  $\theta = (W, \alpha, \beta) \in \mathbb{R}^{n \times m} \times \mathbb{R}_*^+ \times \mathbb{R}_*^+$  such that

$$\phi_\theta(z, x) = \text{ST}(z - \alpha W^\top(Dz - x), \beta\lambda) . \quad (11)$$

Given a set of  $T$  layer parameters  $\Theta^{(T)} = \{\theta^{(t)}\}_{t=0}^{T-1}$ , the LISTA network  $\Phi_{\Theta^{(T)}} : \mathbb{R}^n \rightarrow \mathbb{R}^m$  is  $\Phi_{\Theta^{(T)}}(x) = z^{(T)}(x)$  where  $z^{(t)}(x)$  is defined by recursion

$$z^{(0)}(x) = 0, \text{ and } z^{(t+1)}(x) = \phi_{\theta^{(t)}}(z^{(t)}(x), x) \text{ for } t \in \llbracket 0, T-1 \rrbracket . \quad (12)$$

159 Taking  $W = D$ ,  $\alpha = \beta = \frac{1}{L}$  yields the same outputs as  $T$  iterations of ISTA.

160 To alleviate the need to learn the large matrices  $W^{(t)}$ , Liu et al. (2019) proposed to use a shared  
 161 analytic matrix  $W_{\text{ALISTA}}$  for all layers. The matrix is computed in a preprocessing stage by

$$W_{\text{ALISTA}} = \arg \min_W \|W^\top D\|_F^2 \quad \text{s.t.} \quad \text{diag}(W^\top D) = \mathbf{1}_m. \quad (13)$$

162 Then, only the parameters  $(\alpha^{(t)}, \beta^{(t)})$  are learned. This effectively reduces the number of parameters  
 163 from  $(nm + 2) \times T$  to  $2 \times T$ . However, we will see that ALISTA fails in our setup.

164 **Step-LISTA** With regards to the study on step sizes for ISTA in Section 3, we propose to *learn*  
 165 approximation of ISTA step sizes for the input distribution using the LISTA framework. The resulting  
 166 network, dubbed Step-LISTA (SLISTA), has  $T$  parameters  $\Theta_{\text{SLISTA}} = \{\alpha^{(t)}\}_{t=0}^{T-1}$ , and follows the  
 167 iterations:

$$z^{(t+1)}(x) = \text{ST}(z^{(t)}(x) - \alpha^{(t)} D^\top (D z^{(t)}(x) - x), \alpha^{(t)} \lambda). \quad (14)$$

168 This is equivalent to a coupling in the LISTA parameters: a LISTA layer  $\theta = (W, \alpha, \beta)$  corresponds to  
 169 a SLISTA layer if and only if  $\frac{\alpha}{\beta} W = D$ . This network aims at learning good step sizes, like the ones  
 170 used in OISTA, without the computational burden of computing Lipschitz constants. The number of  
 171 parameters compared to the classical LISTA architecture  $\Theta_{\text{LISTA}}$  is greatly diminished, making the  
 172 network easier to train. Learning curves are shown in Figure ?? in appendix. Figure 4 displays the  
 173 learned steps of a SLISTA network on a toy example. The network learns larger step-sizes as the  
 174  $1/L_S$ 's increase.

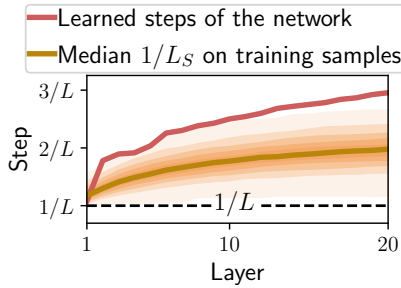

Figure 4: Steps learned with a 20 layers SLISTA network on a  $10 \times 20$  problem. For each layer  $t$  and each training sample  $x$ , we compute the support  $S(x, t)$  of  $z^{(t)}(x)$ . The brown curves display the quantiles of the distribution of  $1/L_{S(x,t)}$  for each layer  $t$ . Full experimental setup described in Appendix D.

175 **Training the network** We consider the framework where the network learns to solve the Lasso on  
 176  $\mathcal{B}_\infty$  in an *unsupervised* way. Given a distribution  $p$  on  $\mathcal{B}_\infty$ , the network is trained by solving

$$\tilde{\Theta}^{(T)} \in \arg \min_{\Theta^{(T)}} \mathcal{L}(\Theta^{(T)}) \triangleq \mathbb{E}_{x \sim p} [F_x(\Phi_{\Theta^{(T)}}(x))] . \quad (15)$$

177 Most of the literature on learned optimization train the network with a different *supervised* objective  
 178 (Gregor and Le Cun, 2010; Xin et al., 2016; Chen et al., 2018; Liu et al., 2019). Given a set of pairs  
 179  $(x^i, z^i)$ , the supervised approach tries to learn the parameters of the network such that  $\Phi_{\Theta}(x^i) \simeq z^i$   
 180 e.g. by minimizing  $\|\Phi_{\Theta}(x^i) - z^i\|^2$ . This training procedure differs critically from ours. For instance,  
 181 ISTA does not converge for the supervised problem in general while it does for the unsupervised  
 182 one. As Proposition 4.1 shows, the unsupervised approach allows to *learn to minimize* the Lasso cost  
 183 function  $F_x$ .

184 **Proposition 4.1** (Pointwise convergence). *Let  $\tilde{\Theta}^{(T)}$  found by solving Problem (15).  
 185 For  $x \in \mathcal{B}_\infty$  such that  $p(x) > 0$ ,  $F_x(\Phi_{\tilde{\Theta}^{(T)}}(x)) \xrightarrow{T \rightarrow +\infty} F_x^*$  almost everywhere.*

186 *Proof.* Let  $\Theta_{\text{ISTA}}^{(T)}$  the parameters corresponding to ISTA i.e.  $\theta_{\text{ISTA}}^{(t)} = (D, 1/L, 1/L)$ . For all  
 187  $T$ , we have  $\mathbb{E}_{x \sim p} [F_x^*] \leq \mathbb{E}_{x \sim p} [F_x(\Phi_{\tilde{\Theta}^{(T)}}(x))] \leq \mathbb{E}_{x \sim p} [F_x(\Phi_{\Theta_{\text{ISTA}}^{(T)}}(x))]$ . Since ISTA converges  
 188 uniformly on any compact, the right hand term goes to  $\mathbb{E}_{x \sim p} [F_x^*]$ . Therefore, by the squeeze theorem,  
 189  $\mathbb{E}_{x \sim p} [F_x(\Phi_{\tilde{\Theta}^{(T)}}(x)) - F_x^*] \rightarrow 0$ . This implies almost sure convergence of  $F_x(\Phi_{\tilde{\Theta}^{(T)}}(x)) - F_x^*$  to 0  
 190 since it is non-negative.  $\square$

191 **Asymptotical weight coupling theorem** In this paragraph, we show the main result of this paper:  
 192 any LISTA network minimizing  $F_x$  on  $\mathcal{B}_\infty$  reduces to SLISTA in its deep layers ([Theorem 4.4](#)). It  
 193 relies on the following Lemmas.

194 **Lemma 4.2** (Stability of solutions around  $D_j$ ). *Let  $D \in \mathbb{R}^{n \times m}$  be a dictionary with non-duplicated  
 195 unit-normed columns. Let  $c \triangleq \max_{l \neq j} |D_l^\top D_j| < 1$ . Then for all  $j \in \llbracket 1, m \rrbracket$  and  $\varepsilon \in \mathbb{R}^m$  such that  
 196  $\|\varepsilon\| < \lambda(1 - c)$  and  $D_j^\top \varepsilon = 0$ , the vector  $(1 - \lambda)e_j$  minimizes  $F_x$  for  $x = D_j + \varepsilon$ .*

197 It can be proven by verifying the KKT conditions (3) for  $(1 - \lambda)e_j$ , detailed in [Subsection C.1](#).

198 **Lemma 4.3** (Weight coupling). *Let  $D \in \mathbb{R}^{n \times m}$  be a dictionary with non-duplicated unit-normed  
 199 columns. Let  $\theta = (W, \alpha, \beta)$  a set of parameters. Assume that all the couples  $(z^*(x), x) \in \mathbb{R}^m \times \mathcal{B}_\infty$   
 200 such that  $z^*(x) \in \arg \min F_x(z)$  verify  $\phi_\theta(z^*(x), x) = z^*(x)$ . Then,  $\frac{\alpha}{\beta}W = D$ .*

201 *Sketch of proof (full proof in [Subsection C.2](#)).* For  $j \in \llbracket 1, m \rrbracket$ , consider  $x = D_j + \varepsilon$ , with  
 202  $\varepsilon^\top D_j = 0$ . For  $\|\varepsilon\|$  small enough,  $x \in \mathcal{B}_\infty$  and  $\varepsilon$  verifies the hypothesis of [Lemma 4.2](#),  
 203 therefore  $z^* = (1 - \lambda)e_j \in \arg \min F_x$ . Writing  $\phi_\theta(z^*, x) = z^*$  for the  $j$ -th coordinate yields  
 204  $\alpha W_j^\top (\lambda D_j + \varepsilon) = \lambda \beta$ . We can then verify that  $(\alpha W_j^\top - \beta D_j^\top)(\lambda D_j + \varepsilon) = 0$ . This stands for  
 205 any  $\varepsilon$  orthogonal to  $D_j$  and of norm small enough. Simple linear algebra shows that this implies  
 206  $\alpha W_j - \beta D_j = 0$ .  $\square$

207 [Lemma 4.3](#) states that the Lasso solutions are fixed points of a LISTA layer only if this layer  
 208 corresponds to a step size for ISTA. The following theorem extends the lemma by continuity, and  
 209 shows that the deep layers of any converging LISTA network must tend toward a SLISTA layer.

210 **Theorem 4.4.** *Let  $D \in \mathbb{R}^{n \times m}$  be a dictionary with non-duplicated unit-normed columns. Let  
 211  $\Theta^{(T)} = \{\theta^{(t)}\}_{t=0}^T$  be the parameters of a sequence of LISTA networks such that the transfer function  
 212 of the layer  $t$  is  $z^{(t+1)} = \phi_{\theta^{(t)}}(z^{(t)}, x)$ . Assume that*

- 213 (i) *the sequence of parameters converges i.e.  $\theta^{(t)} \xrightarrow{t \rightarrow \infty} \theta^* = (W^*, \alpha^*, \beta^*)$ ,*
- 214 (ii) *the output of the network converges toward a solution  $z^*(x)$  of the Lasso (1) uniformly over  
 215 the equiregularization set  $\mathcal{B}_\infty$ , i.e.  $\sup_{x \in \mathcal{B}_\infty} \|\Phi_{\Theta^{(T)}}(x) - z^*(x)\| \xrightarrow{T \rightarrow \infty} 0$ .*

216 Then  $\frac{\alpha^*}{\beta^*}W^* = D$ .

217 *Sketch of proof (full proof in [Subsection C.3](#)).* Let  $\varepsilon > 0$ , and  $x \in \mathcal{B}_\infty$ . Using the triangular in-  
 218 equality, we have

$$\|\phi_{\theta^*}(z^*, x) - z^*\| \leq \|\phi_{\theta^*}(z^*, x) - \phi_{\theta^{(t)}}(z^{(t)}, x)\| + \|\phi_{\theta^{(t)}}(z^{(t)}, x) - z^*\| \quad (16)$$

219 Since the  $z^{(t)}$  and  $\theta^{(t)}$  converge, they are valued over a compact set  $K$ . The function  $f : (z, x, \theta) \mapsto$   
 220  $\phi_\theta(z, x)$  is continuous, piecewise-linear. It is therefore Lipschitz on  $K$ . Hence, we have  $\|\phi_{\theta^*}(z^*, x) -$   
 221  $\phi_{\theta^{(t)}}(z^{(t)}, x)\| \leq \varepsilon$  for  $t$  large enough. Since  $\phi_{\theta^{(t)}}(z^{(t)}, x) = z^{(t+1)}$  and  $z^{(t)} \rightarrow z^*$ ,  $\|\phi_{\theta^{(t)}}(z^{(t)}, x) -$   
 222  $z^*\| \leq \varepsilon$  for  $t$  large enough. Finally,  $\phi_{\theta^*}(z^*, x) = z^*$ . [Lemma 4.3](#) allows to conclude.  $\square$

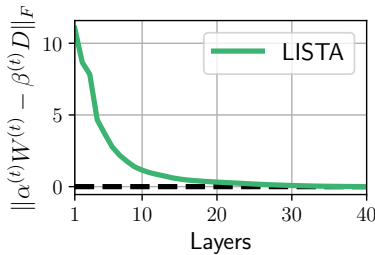

Figure 5: Illustration of [Theorem 4.4](#): for deep layers of LISTA, we have  $\|\alpha^{(t)}W^{(t)} - \beta^{(t)}D\|_F \rightarrow 0$ , indicating that the network ultimately only learns a step size. Full experimental setup described in [Appendix D](#).

223 [Theorem 4.4](#) means that the deep layers of any LISTA network that converges to solutions of the  
 224 Lasso correspond to SLISTA iterations:  $W^{(t)}$  aligns with  $D$ , and  $\alpha^{(t)}, \beta^{(t)}$  get coupled. This is  
 225 illustrated in [Figure 5](#), where a 40-layers LISTA network is trained on a  $10 \times 20$  problem with

226  $\lambda = 0.1$ . As predicted by the theorem,  $\frac{\alpha^{(t)}}{\beta^{(t)}} W^{(t)} \rightarrow D$ . The last layers only learn a step size. This  
 227 is consistent with the observation of Moreau and Bruna (2017) which shows that the deep layers  
 228 of LISTA stay close to ISTA. Further, Theorem 4.4 also shows that it is hopeless to optimize the  
 229 unsupervised objective (15) with  $W_{\text{ALISTA}}$  (13), since this matrix is not aligned with  $D$ .

## 230 5 Numerical Experiments

231 This section provides numerical arguments to compare SLISTA to LISTA and ISTA. All the experi-  
 232 ments were run using Python (Python Software Foundation, 2017) and pytorch (Paszke et al., 2017).  
 233 The code to reproduce the figures is available online<sup>1</sup>.

234 **Network comparisons** We compare the proposed approach SLISTA to state-of-the-art learned  
 235 methods LISTA (Chen et al., 2018) and ALISTA (Liu et al., 2019) on synthetic and semi-real cases.

236 In the synthetic case, a dictionary  $D \in \mathbb{R}^{n \times m}$  of Gaussian i.i.d. entries is generated. Each column is  
 237 then normalized to one. A set of Gaussian i.i.d. samples  $(\tilde{x}^i)_{i=1}^N \in \mathbb{R}^n$  is drawn. The input samples  
 238 are obtained as  $x^i = \tilde{x}^i / \|D^\top \tilde{x}^i\|_\infty \in \mathcal{B}_\infty$ , so that for all  $i$ ,  $x^i \in \mathcal{B}_\infty$ . We set  $m = 256$  and  
 239  $n = 64$ .

240 For the semi-real case, we used the digits dataset from scikit-learn (Pedregosa et al., 2011) which  
 241 consists of  $8 \times 8$  images of handwritten digits from 0 to 9. We sample  $m = 256$  samples at random  
 242 from this dataset and normalize it to generate our dictionary  $D$ . Compared to the simulated Gaussian  
 243 dictionary, this dictionary has a much richer correlation structure, which is known to imper the  
 244 performances of learned algorithms (Moreau and Bruna, 2017). The input distribution is generated as  
 245 in the simulated case.

246 The networks are trained by minimizing the empirical loss  $\mathcal{L}$  (15) on a training set of size  $N_{\text{train}} =$   
 247 10,000 and we report the loss on a test set of size  $N_{\text{test}} = 10,000$ . Further details on training are in  
 248 Appendix D.

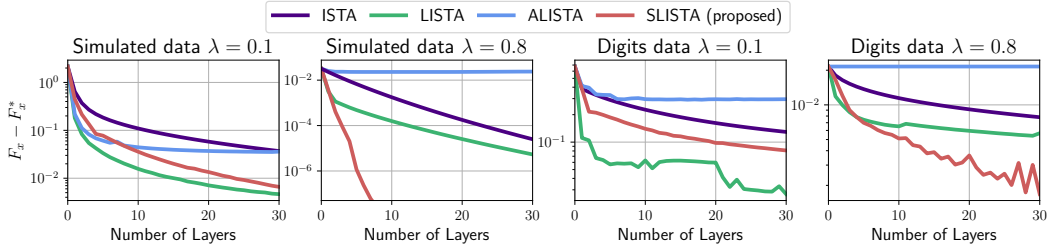

Figure 6: Test loss of ISTA, ALISTA, LISTA and SLISTA on simulated and semi-real data for different regularization parameters.

249 Figure 6 shows the test curves for different levels of regularization  $\lambda = 0.1$  and  $0.8$ . SLISTA performs  
 250 best for high  $\lambda$ , even for challenging semi-real dictionary  $D$ . In a low regularization setting, LISTA  
 251 performs best as SLISTA cannot learn larger steps due to the low sparsity of the solution. In this  
 252 unsupervised setting, ALISTA does not converge in accordance with Theorem 4.4.

## 253 6 Conclusion

254 We showed that using larger step sizes is an efficient strategy to accelerate ISTA for sparse solution  
 255 of the Lasso. In order to make this approach practical, we proposed SLISTA, a neural network  
 256 architecture which learns such step sizes. Theorem 4.4 shows that the deepest layers of any converging  
 257 LISTA architecture must converge to a SLISTA layer. Numerical experiments show that SLISTA  
 258 outperforms LISTA in a high sparsity setting. A major benefit of our approach is that it preserves  
 259 the dictionary. We plan on leveraging this property to apply SLISTA in convolutional or wavelet  
 260 cases, where the structure of the dictionary allows for fast multiplications.

<sup>1</sup> The code can be found in supplementary materials.

## References

- Jonas Adler, Axel Ringh, Ozan Öktem, and Johan Karlsson. Learning to solve inverse problems using Wasserstein loss. *preprint ArXiv*, 1710.10898, 2017.
- Amir Beck and Marc Teboulle. A fast iterative shrinkage-thresholding algorithm for linear inverse problems. *SIAM journal on imaging sciences*, 2(1):183–202, 2009.
- Mark Borgerding, Philip Schniter, and Sundeep Rangan. AMP-inspired deep networks for sparse linear inverse problems. *IEEE Transactions on Signal Processing*, 65(16):4293–4308, 2017.
- Xiaohan Chen, Jialin Liu, Zhangyang Wang, and Wotao Yin. Theoretical linear convergence of unfolded ISTA and its practical weights and thresholds. In *Advances in Neural Information Processing Systems (NIPS)*, pages 9061–9071, 2018.
- Patrick L Combettes and Heinz H. Bauschke. *Convex Analysis and Monotone Operator Theory in Hilbert Spaces*. Springer, 2011. ISBN 9788578110796. doi: 10.1017/CBO9781107415324.004.
- Ingrid Daubechies, Michel Defrise, and Christine De Mol. An iterative thresholding algorithm for linear inverse problems with a sparsity constraint. *Communications on Pure and Applied Mathematics*, 57(11):1413–1457, 2004.
- Bradley Efron, Trevor Hastie, Iain Johnstone, and Robert Tibshirani. Least angle regression. *Ann. Statist.*, 32(2):407–499, 2004.
- Laurent El Ghaoui, Vivian Viallon, and Tarek Rabbani. Safe feature elimination in sparse supervised learning. *J. Pacific Optim.*, 8(4):667–698, 2012.
- Jerome Friedman, Trevor Hastie, Holger Höfling, and Robert Tibshirani. Pathwise coordinate optimization. *The Annals of Applied Statistics*, 1(2):302–332, 2007.
- Raja Giryes, Yonina C. Eldar, Alex M. Bronstein, and Guillermo Sapiro. Tradeoffs between convergence speed and reconstruction accuracy in inverse problems. *IEEE Transaction on Signal Processing*, 66(7):1676–1690, 2018.
- Karol Gregor and Yann Le Cun. Learning Fast Approximations of Sparse Coding. In *International Conference on Machine Learning (ICML)*, pages 399–406, 2010.
- Elaine Hale, Wotao Yin, and Yin Zhang. Fixed-point continuation for  $\ell_1$ -minimization: Methodology and convergence. *SIAM J. Optim.*, 19(3):1107–1130, 2008.
- Trevor Hastie, Robert Tibshirani, and Martin Wainwright. *Statistical Learning with Sparsity: The Lasso and Generalizations*. CRC Press, 2015.
- John R. Hershey, Jonathan Le Roux, and Felix Weninger. Deep unfolding: Model-based inspiration of novel deep architectures. *preprint ArXiv*, 1409.2574, 2014.
- Daisuke Ito, Satoshi Takabe, and Tadashi Wadayama. Trainable ISTA for sparse signal recovery. In *IEEE International Conference on Communications Workshops*, pages 1–6, 2018.
- Tyler Johnson and Carlos Guestrin. Blitz: A principled meta-algorithm for scaling sparse optimization. In *International Conference on Machine Learning (ICML)*, pages 1171–1179, 2015.
- Jingwei Liang, Jalal Fadili, and Gabriel Peyré. Local linear convergence of forward–backward under partial smoothness. In *Advances in Neural Information Processing Systems*, pages 1970–1978, 2014.
- Jialin Liu, Xiaohan Chen, Zhangyang Wang, and Wotao Yin. ALISTA: Analytic weights are as good as learned weights in LISTA. In *International Conference on Learning Representation (ICLR)*, 2019.
- Vladimir A Marchenko and Leonid Andreevich Pastur. Distribution of eigenvalues for some sets of random matrices. *Mathematics of the USSR-Sbornik*, 1(4):457, 1967.
- Mathurin Massias, Alexandre Gramfort, and Joseph Salmon. Celer: a Fast Solver for the Lasso with Dual Extrapolation. In *International Conference on Machine Learning (ICML)*, 2018.
- Thomas Moreau and Joan Bruna. Understanding neural sparse coding with matrix factorization. In *International Conference on Learning Representation (ICLR)*, 2017.
- Eugene Ndiaye, Olivier Fercoq, Alexandre Gramfort, and Joseph Salmon. Gap safe screening rules for sparsity enforcing penalties. *J. Mach. Learn. Res.*, 18(128):1–33, 2017.

311 Yurii Nesterov. A method for solving a convex programming problem with rate of convergence  
312  $O(1/k^2)$ . *Soviet Math. Doklady*, 269(3):543–547, 1983.

313 Bruno A. Olshausen and David J Field. Sparse coding with an incomplete basis set: a strategy  
314 employed by V1, 1997.

315 Adam Paszke, Sam Gross, Soumith Chintala, Gregory Chanan, Edward Yang, Zachary DeVito,  
316 Zeming Lin, Alban Desmaison, Luca Antiga, and Adam Lerer. Automatic differentiation in  
317 PyTorch. In *NIPS Autodiff Workshop*, 2017.

318 F. Pedregosa, G. Varoquaux, A. Gramfort, V. Michel, B. Thirion, O. Grisel, M. Blondel, P. Pretten-  
319 hofer, R. Weiss, V. Dubourg, J. Vanderplas, A. Passos, D. Cournapeau, M. Brucher, M. Perrot, and  
320 E. Duchesnay. Scikit-learn: Machine learning in Python. *Journal of Machine Learning Research*,  
321 12:2825–2830, 2011.

322 Clarice Poon, Jingwei Liang, and Carola-Bibiane Schönlieb. Local convergence properties of SAGA  
323 and prox-SVRG and acceleration. In *International Conference on Machine Learning (ICML)*,  
324 2018.

325 Python Software Foundation. Python Language Reference, version 3.6. <http://python.org/>, 2017.

326 Saharon Rosset, Ji Zhu, and Trevor Hastie. Boosting as a regularized path to a maximum margin  
327 classifier. *J. Mach. Learn. Res.*, 5:941–973, 2004.

328 Pablo Sprechmann, Alex M. Bronstein, and Guillermo Sapiro. Learning efficient structured sparse  
329 models. In *International Conference on Machine Learning (ICML)*, pages 615–622, 2012.

330 Pablo Sprechmann, Roei Litman, and TB Yakar. Efficient supervised sparse analysis and synthesis  
331 operators. In *Advances in Neural Information Processing Systems (NIPS)*, pages 908–916, 2013.

332 Yifan Sun, Halyun Jeong, Julie Nutini, and Mark Schmidt. Are we there yet? manifold identification  
333 of gradient-related proximal methods. In *Proceedings of Machine Learning Research*, volume 89  
334 of *Proceedings of Machine Learning Research*, pages 1110–1119. PMLR, 2019.

335 Robert Tibshirani. Regression shrinkage and selection via the lasso. *Journal of the Royal Statistical*  
336 *Society: Series B (Methodological)*, 58(1):267–288, 1996.

337 Ryan Tibshirani. The lasso problem and uniqueness. *Electron. J. Stat.*, 7:1456–1490, 2013.

338 Paul Tseng. Convergence of a block coordinate descent method for nondifferentiable minimization.  
339 *J. Optim. Theory Appl.*, 109(3):475–494, 2001.

340 Zhangyang Wang, Qing Ling, and Thomas S. Huang. Learning deep  $\ell_0$  encoders. In *AAAI Conference*  
341 *on Artificial Intelligence*, pages 2194–2200, 2015.

342 Bo Xin, Yizhou Wang, Wen Gao, and David Wipf. Maximal sparsity with deep networks? In  
343 *Advances in Neural Information Processing Systems (NIPS)*, pages 4340–4348, 2016.

344 Yan Yang, Jian Sun, Huibin Li, and Zongben Xu. Deep ADMM-Net for compressive sensing MRI.  
345 In *Advances in Neural Information Processing Systems (NIPS)*, pages 10–18, 2017.

346 Willard I Zangwill. Convergence conditions for nonlinear programming algorithms. *Management*  
347 *Science*, 16(1):1–13, 1969.

348 Jian Zhang and Bernard Ghanem. ISTA-Net: Interpretable optimization-inspired deep network for  
349 image compressive sensing. In *IEEE Computer Society Conference on Computer Vision and*  
350 *Pattern Recognition*, pages 1828–1837, 2018.

## A Unfolded optimization algorithms literature summary

In Table A.1, we summarize the prolific literature on learned unfolded optimization procedures for sparse recovery. A particular focus is set on the chosen training loss training which is either supervised, with a regression of  $z^i$  from the input  $x^i$  for a given training set  $(x^i, z^i)$ , or unsupervised, where the objective is to minimize the Lasso cost function  $F_x$  for each training point  $x$ .

Table A.1: Neural network for sparse coding

| Reference                | Base Algo | Train Loss   | Coupled weights     | Remarks                             |
|--------------------------|-----------|--------------|---------------------|-------------------------------------|
| Gregor and Le Cun (2010) | ISTA / CD | supervised   | $\times$            | –                                   |
| Sprechmann et al. (2012) | Block CD  | unsupervised | $\times$            | Group $\ell_1$                      |
| Sprechmann et al. (2013) | ADMM      | supervised   | N/A                 | –                                   |
| Hershey et al. (2014)    | NMF       | supervised   | $\times$            | NMF                                 |
| Wang et al. (2015)       | IHT       | supervised   | $\times$            | Hard-thresholding                   |
| Xin et al. (2016)        | IHT       | supervised   | $\times/\checkmark$ | Hard-thresholding                   |
| Giryes et al. (2018)     | PGD/IHT   | supervised   | N/A                 | Group $\ell_1$                      |
| Yang et al. (2017)       | ADMM      | supervised   | N/A                 | –                                   |
| Adler et al. (2017)      | ADMM      | supervised   | N/A                 | Wasserstein distance with $z^*$     |
| Borgerding et al. (2017) | AMP       | supervised   | $\times$            | –                                   |
| Moreau and Bruna (2017)  | ISTA      | unsupervised | $\times$            | –                                   |
| Chen et al. (2018)       | ISTA      | supervised   | $\checkmark$        | Linear convergence rate             |
| Ito et al. (2018)        | ISTA      | supervised   | $\checkmark$        | MMSE shrinkage non-linearity        |
| Zhang and Ghanem (2018)  | PGD       | supervised   | $\checkmark$        | Sparsity of Wavelet coefficients    |
| Liu et al. (2019)        | ISTA      | supervised   | $\checkmark$        | Analytic weight $W_{\text{ALISTA}}$ |
| <b>Proposed</b>          | ISTA      | unsupervised | $\checkmark$        | –                                   |

## B Proofs of Section 3’s results

### B.1 Proof of Proposition 3.1

We consider that the solution of the Lasso is unique, following the result of Tibshirani (2013)[Lemmas 4 and 16] when the entries of  $D$  and  $x$  come from a continuous distribution.

**Proposition 3.1** (Convergence, finite-time support identification and safe regime). *When Assumption 2.2 holds, the sequence  $(z^{(t)})$  generated by the algorithm converges to  $z^* = \arg \min F_x$ .*

*Further, there exists an iteration  $T^*$  such that for  $t \geq T^*$ ,  $\text{supp}(z^{(t)}) = \text{supp}(z^*) \triangleq S^*$  and Condition  $\star$  is always satisfied.*

*Proof.* Let  $z^{(t)}$  be the sequence of iterates produced by Algorithm 1. We have a descent function

$$F_x(z^{(t+1)}) - F_x(z^{(t)}) \leq -\frac{\gamma}{2} \|z^{(t+1)} - z^{(t)}\|^2 \leq -\frac{\min \|D_j\|}{2} \|z^{(t+1)} - z^{(t)}\|^2, \quad (17)$$

where  $\gamma = L_S$  if Condition  $\star$  is met, and  $L$  otherwise. Additionally, the iterates are bounded because  $F_x(z^{(t)})$  decreases at each iteration and  $F_x$  is coercive. Hence we can apply Zangwill’s Global Convergence Theorem (Zangwill, 1969). Any  $z^*$  accumulation point of  $(z^{(t)})_{t \in \mathbb{N}}$  is a minimizer of  $F_x$ .

Since we only consider the case where the minimizer is unique, the bounded sequence  $(z^{(t)})_{t \in \mathbb{N}}$  has a unique accumulation point, thus converges to  $z^*$ .

The support identification is a simplification of a result of Hale et al. (2008), we include it here for completeness.

373 **Lemma B.1** (Approximation of the soft-thresholding). *Let  $z \in \mathbb{R}, \nu > 0$ . For  $\epsilon$  small enough, we*  
 374 *have*

$$\text{ST}(z + \epsilon, \nu) = \begin{cases} 0, & \text{if } |z| < \nu, \\ \max(0, \epsilon) \text{sign}(z), & \text{if } |z| = \nu, \\ z + \epsilon - \nu \text{sign } z, & \text{if } |z| > \nu. \end{cases} \quad (18)$$

375 Let  $\rho > 0$  be such that Equation (18) holds for  $\nu = \lambda/L$ , every  $\epsilon < \rho$ , and every  $z = z_j^* -$   
 376  $\frac{1}{L}D_j^\top(Dz^* - x)$ .

377 Let  $t \in \mathbb{N}$  such that  $z^{(t)} = z^* + \epsilon$ , with  $\|\epsilon\| \leq \rho$ . With  $\epsilon' \triangleq (\text{Id} - \frac{1}{L}D^\top D)\epsilon$ , we also have  $\|\epsilon'\| \leq \rho$ .  
 378 Let  $j \in \llbracket 1, m \rrbracket$ .

379 If  $j \notin E$ ,  $|z_j^* - \frac{1}{L}D_j^\top(Dz^* - x)| = |\frac{1}{L}D_j^\top(Dz^* - x)| < \lambda/L$  hence  $\text{ST}(z_j^* - \frac{1}{L}D_j^\top(Dz^* - x) +$   
 380  $\epsilon'_j, \lambda/L) = 0$ .

381 If  $j \in E$ ,  $|z_j^* - \frac{1}{L}D_j^\top(Dz^* - x)| = |z_j^* + \frac{\lambda}{L} \text{sign } z_j^*| > \lambda/L$ , and  $\text{sign ST}(z_j^* - \frac{1}{L}D_j^\top(Dz^* - x) +$   
 382  $\epsilon'_j, \lambda/L) = \text{sign } z_j^*$ .

383 The same reasoning can be applied with  $\rho'$  such that Equation (18) holds for  $\nu = \lambda/L_{S^*}$ , every  
 384  $\epsilon < \rho'$ , and every  $z = z_j^* - \frac{1}{L_{S^*}}D_j^\top(Dz^* - x)$ . If we introduce  $\eta > 0$  such that  $\|\epsilon\| \leq \eta \implies$   
 385  $\|(\text{Id} - \frac{1}{L_{S^*}}D^\top D)\epsilon\| \leq \rho'$ , in the ball of center  $z^*$  and radius  $\eta$ , the iteration with step size  $L_{S^*}$   
 386 identifies the support.

387 Additionnally, since  $\text{Id} - \frac{1}{L_{S^*}}D_{S^*}^\top D_{S^*}$  is non expansive on vectors which support is  $S^*$ , the iterations  
 388 with the step  $L_{S^*}$  never leave this ball once they have entered it.

389 Therefore, once the iterates enter  $\mathcal{B}(z^*, \min(\eta, \rho))$ , Condition  $\star$  is always satisfied.

390 □

## 391 B.2 Proof of Proposition 3.2

392 **Proposition 3.2** (Rates of convergence). *For  $t > T^*$ ,  $F_x(z^{(t)}) - F_x(z^*) \leq L_{S^*} \frac{\|z^* - z^{(T^*)}\|^2}{2(t - T^*)}$ .*

393 *If additionally  $\inf_{\|z\|=1} \|D_{S^*} z\|^2 = \mu^* > 0$ , then the convergence rate for  $t \geq T^*$  is*

394  $F_x(z^{(t)}) - F_x(z^*) \leq (1 - \frac{\mu^*}{L_{S^*}})^{t - T^*} (F_x(z^{(T^*)}) - F_x(z^*))$ .

395 *Proof.* For  $t \geq T^*$ , the iterates support is  $S^*$  and the objective function is  $L_{S^*}$ -smooth instead of  
 396  $L$ -smooth. It is also  $\mu^*$  strongly convex if  $\mu^* > 0$ . The obtained rates are a classical result of the  
 397 proximal gradient descent method in these cases. □

## 398 C Proof of Section 4's Lemmas

### 399 C.1 Proof of Lemma 4.2

400 **Lemma 4.2** (Stability of solutions around  $D_j$ ). *Let  $D \in \mathbb{R}^{n \times m}$  be a dictionary with non-duplicated*  
 401 *unit-normed columns. Let  $c \triangleq \max_{l \neq j} |D_l^\top D_j| < 1$ . Then for all  $j \in \llbracket 1, m \rrbracket$  and  $\varepsilon \in \mathbb{R}^m$  such that*  
 402  *$\|\varepsilon\| < \lambda(1 - c)$  and  $D_j^\top \varepsilon = 0$ , the vector  $(1 - \lambda)e_j$  minimizes  $F_x$  for  $x = D_j + \varepsilon$ .*

403 *Proof.* Let  $j \in \llbracket 1, m \rrbracket$  and let  $\varepsilon \in \mathbb{R}^m \cap D_j^\perp$  be a vector such that  $\|\varepsilon\| < \lambda(1 - c)$ .

404 For notation simplicity, we denote  $z^* = z^*(D_j - \varepsilon)$ .

$$D_j^\top(Dz^* - D_j - \varepsilon) = D_j^\top(-\lambda D_j - \varepsilon) = -\lambda = -\lambda \text{sign } z_j^*, \quad (19)$$

405 since  $1 - \lambda > 0$ . For the other coefficients  $l \in \llbracket 1, m \rrbracket \setminus \{j\}$ , we have

$$|D_l^\top (Dz^* - D_j - \varepsilon)| = |D_l^\top (-\lambda D_j - \varepsilon)|, \quad (20)$$

$$= |\lambda D_l^\top D_j + D_l^\top \varepsilon|, \quad (21)$$

$$\leq \lambda |D_l^\top D_j| + |D_l^\top \varepsilon|, \quad (22)$$

$$\leq \lambda c + \|D_l\| \|\varepsilon\|, \quad (23)$$

$$\leq \lambda c + \|\varepsilon\| < \lambda, \quad (24)$$

$$(25)$$

406 Therefore,  $(1 - \lambda)e_j$  verifies the KKT conditions (3) and  $z^*(D_j + \varepsilon) = (1 - \lambda)e_j$ .  $\square$

## 407 C.2 Proof of Lemma 4.3

408 **Lemma 4.3** (Weight coupling). *Let  $D \in \mathbb{R}^{n \times m}$  be a dictionary with non-duplicated unit-normed*  
 409 *columns. Let  $\theta = (W, \alpha, \beta)$  a set of parameters. Assume that all the couples  $(z^*(x), x) \in \mathbb{R}^m \times \mathcal{B}_\infty$*   
 410 *such that  $z^*(x) \in \arg \min F_x(z)$  verify  $\phi_\theta(z^*(x), x) = z^*(x)$ . Then,  $\frac{\alpha}{\beta}W = D$ .*

411 *Proof.* Let  $x \in \mathcal{B}_\infty$  be an input vector and  $z^*(x) \in \mathbb{R}^m$  be a solution for the Lasso at level  $\lambda > 0$ .  
 412 Let  $j \in \llbracket 1, m \rrbracket$  be such that  $z_j^* > 0$ . The KKT conditions (3) gives

$$D_j^\top (Dz^*(x) - x) = -\lambda. \quad (26)$$

413 Suppose that  $z^*(x)$  is a fixed point of the layer, then we have

$$\text{ST}(z_j^*(x) - \alpha W_j^\top (Dz^*(x) - x), \lambda\beta) = z_j^*(x) > 0. \quad (27)$$

414 By definition,  $\text{ST}(a, b) > 0$  implies that  $a > b$  and  $\text{ST}(a, b) = a - b$ . Thus,

$$z_j^*(x) - \alpha W_j^\top (Dz^*(x) - x) - \lambda\beta = z_j^*(x) \quad (28)$$

$$\Leftrightarrow \alpha W_j^\top (Dz^*(x) - x) + \lambda\beta = 0 \quad (29)$$

$$\Leftrightarrow \alpha W_j^\top (Dz^*(x) - x) - \beta D_j^\top (Dz^*(x) - x) = 0 \quad \text{by (26)} \quad (30)$$

$$\Leftrightarrow (\alpha W_j - \beta D_j)^\top (Dz^*(x) - x) = 0. \quad (31)$$

415 As the relation (31) must hold for all  $x \in \mathcal{B}_\infty$ , it is true for all  $D_j + \varepsilon$  for all  $\varepsilon \in \mathcal{B}(0, \lambda(1 - c)) \cap D_j^\perp$ .  
 416 Indeed, in this case,  $\|D^\top (D_j + \varepsilon)\|_\infty = 1$ .  $D$  verifies the conditions of Lemma 4.2, and thus  
 417  $z^* = (1 - \lambda)e_j$ , i.e.

$$(\alpha W_j - \beta D_j)^\top (D(1 - \lambda)e_j - (D_j + \varepsilon)) = 0 \quad (32)$$

$$(\alpha W_j - \beta D_j)^\top (-\lambda D_j - \varepsilon) = 0 \quad (33)$$

418 Taking  $\varepsilon = 0$  yields  $(\alpha W_j - \beta D_j)^\top D_j = 0$ , and therefore Eq. (33) becomes  $(\alpha W_j - \beta D_j)^\top \varepsilon = 0$   
 419 for all  $\varepsilon$  small enough and orthogonal to  $D_j$ , which implies  $\alpha W_j - \beta D_j = 0$  and concludes our  
 420 proof.  $\square$

## 421 C.3 Proof of Theorem 4.4

422 **Theorem 4.4.** *Let  $D \in \mathbb{R}^{n \times m}$  be a dictionary with non-duplicated unit-normed columns. Let*  
 423  *$\Theta^{(T)} = \{\theta^{(t)}\}_{t=0}^T$  be the parameters of a sequence of LISTA networks such that the transfer function*  
 424 *of the layer  $t$  is  $z^{(t+1)} = \phi_{\theta^{(t)}}(z^{(t)}, x)$ . Assume that*

425 (i) *the sequence of parameters converges i.e.  $\theta^{(t)} \xrightarrow{t \rightarrow \infty} \theta^* = (W^*, \alpha^*, \beta^*)$ ,*

426 (ii) *the output of the network converges toward a solution  $z^*(x)$  of the Lasso (1) uniformly over*  
 427 *the equiregularization set  $\mathcal{B}_\infty$ , i.e.  $\sup_{x \in \mathcal{B}_\infty} \|\Phi_{\Theta^{(T)}}(x) - z^*(x)\| \xrightarrow{T \rightarrow \infty} 0$ .*

428 Then  $\frac{\alpha^*}{\beta^*}W^* = D$ .

429 *Proof.* For simplicity of the notation, we will drop the  $x$  variable whenever possible, i.e.  $z^* = z^*(x)$   
 430 and  $\phi_\theta(z) = \phi_\theta(z, x)$ . We denote  $z^{(t)} = \Phi_{\Theta^{(t)}}(x)$  the output of the network with  $t$  layers.  
 431 Let  $\epsilon > 0$ . By hypothesis (i), there exists  $T_0$  such that for all  $t \geq T_0$ ,

$$\|W^{(t)} - W^*\| \leq \epsilon \quad |\alpha^{(t)} - \alpha^*| \leq \epsilon \quad |\beta^{(t)} - \beta^*| \leq \epsilon. \quad (34)$$

432 By hypothesis (ii), there exists  $T_1$  such that for all  $t \geq T_1$  and all  $x \in \mathcal{B}_\infty$ ,

$$\|z^{(t)} - z^*\| \leq \epsilon. \quad (35)$$

433 Let  $x \in \mathcal{B}_\infty$  be an input vector and  $t \geq \max(T_0, T_1)$ . Using (35), we have

$$\|z^{(t+1)} - z^{(t)}\| \leq \|z^{(t+1)} - z^*\| + \|z^{(t)} - z^*\| \leq 2\epsilon \quad (36)$$

434 By (i), there exist a compact set  $\mathcal{K}_1 \subset \mathbb{R}^{n \times m} \times \mathbb{R}_*^+ \times \mathbb{R}_*^+$  s.t.  $\theta^{(t)} \in \mathcal{K}_1$  for all  $t \in \mathbb{N}$  and  
 435  $\theta^* \in \mathcal{K}$ . The input  $x$  is taken in a compact set  $\mathcal{B}_\infty$  and as  $z^* = \arg \min_z F_x(z)$ , we have  
 436  $\lambda \|z\|_1 \leq F_x(z^*) \leq F_x(0) = \|x\|$  thus  $z^*$  is also in a compact set  $\mathcal{K}_2$ .

437 We consider the function  $f(z, x, \theta) = \text{ST}(z - \alpha W^\top(Dz - x), \beta)$  on the compact set  $\mathcal{K}_2 \times \mathcal{B}_\infty \times \mathcal{K}_1$ .  
 438 This function is continuous and piece-wise linear on a compact set. It is thus  $L$ -Lipschitz and thus

$$\|\phi_{\theta^{(t)}}(z^{(t)}) - \phi_{\theta^{(t)}}(z^*)\| \leq L \|z^{(t)} - z^*\| \leq L\epsilon \quad (37)$$

$$\|\phi_{\theta^*}(z^*) - \phi_{\theta^{(t)}}(z^*)\| \leq L \|\theta^{(t)} - \theta^*\| \leq L\epsilon \quad (38)$$

439 Using these inequalities, we get

$$\begin{aligned} \|\phi_{\theta^*}(z^*, x) - z^*\| &\leq \underbrace{\|\phi_{\theta^*}(z^*) - \phi_{\theta^{(t)}}(z^*)\|}_{< L\epsilon \text{ by (38)}} + \underbrace{\|\phi_{\theta^{(t)}}(z^*) - \phi_{\theta^{(t)}}(z^{(t)})\|}_{< L\epsilon \text{ by (37)}} \\ &\quad + \underbrace{\|\phi_{\theta^{(t)}}(z^{(t)}) - z^{(t)}\|}_{< 2\epsilon \text{ by (36)}} + \underbrace{\|z^{(t)} - z^*\|}_{< \epsilon \text{ by (35)}} \\ &\leq (2L + 3)\epsilon. \end{aligned} \quad (39) \quad (40)$$

440 As this result holds for all  $\epsilon > 0$  and all  $x \in \mathcal{B}_\infty$ , we have  $\phi_{\theta^*}(z^*) = z^*$  for all  $x \in \mathcal{B}_\infty$ . We can  
 441 apply the Lemma 4.3 to conclude this proof.  $\square$

## 442 D Experimental setups and supplementary figures

443 **Dictionary generation:** Unless specified otherwise, to generate synthetic dictionaries, we first draw  
 444 a random i.i.d. Gaussian matrix  $\hat{D} \in \mathbb{R}^{n \times m}$ . The dictionary is obtained by normalizing the columns:  
 445  $D_{ij} = \frac{1}{\|\hat{D}_{:,i}\|} \hat{D}_{ij}$ .

446 **Samples generation:** The samples  $x$  are generated as follows: Random i.i.d. Gaussian samples  
 447  $\hat{x} \in \mathbb{R}^n$  are generated. We then normalize them:  $x = \frac{1}{\|D^\top \hat{x}\|_\infty} \hat{x}$ , so that  $x \in \mathcal{B}_\infty$ .

448 **Training the networks** Since the loss function and the network are continuous but non-differentiable,  
 449 we use sub-gradient descent for training. The sub-gradient of the cost function with respect to the  
 450 parameters of the network is computed by automatic differentiation. We use full-batch sub-gradient  
 451 descent with a backtracking procedure to find a suitable learning rate. To verify that we do not overfit  
 452 the training set, we always check that the test loss and train loss are comparable.

### 453 Main text figures setup

- 454 • **Figure 2:** We generate a random dictionary of size  $10 \times 50$ . We take  $\lambda = 0.5$ , and a random  
 455 sample  $x \in \mathcal{B}_\infty$ .  $F_x^*$  is computed by iterating ISTA for 10000 iterations.
- 456 • **Figure 4:** We generate a random dictionary of size  $10 \times 20$ . We take  $\lambda = 0.2$ . We generate  
 457 a training set of  $N = 1000$  samples  $(x^i)_{i=1}^{1000} \in \mathcal{B}_\infty$ . A 20 layers SLISTA network is trained  
 458 by gradient descent on these data. We report the learned step sizes. For each layer  $t$  of  
 459 the network and each training sample  $x$ , we compute the support at the output of the  $t$ -th  
 460 layer,  $S(x, t) = \text{supp}(z^{(t)}(x))$ . For each  $t$ , we display the quantiles of the distribution of  
 461 the  $(1/L_{S(x^i, t)})_{i=1}^{1000}$ .
- 462 • **Figure 5:** A random  $10 \times 20$  dictionary is generated. We take 1000 training samples, and  
 463  $\lambda = 0.05$ . A 40 layers LISTA network is trained by gradient descent on those samples. We  
 464 report the quantity  $\|\alpha^{(t)} W^{(t)} - \beta^{(t)} D\|_F$  for each layer  $t$ .

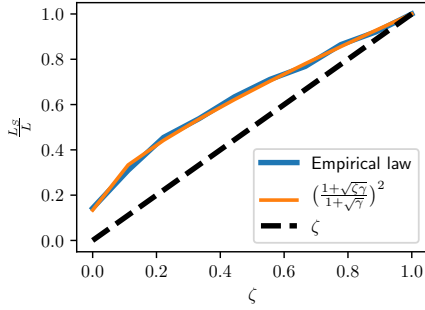

Figure D.1: Illustration of [Proposition 3.4](#). A toy Gaussian dictionary is generated with  $n = 200$ ,  $m = 600$  so that  $\gamma = 3$ . We compute its Lipschitz constant  $L$ . For  $\zeta$  between 0 and 1, we extract  $\lfloor \zeta m \rfloor$  columns at random and compute the corresponding Lipschitz constant  $L_S$ . The plot shows an almost perfect fit between the empirical law and the theoretical limit (10).

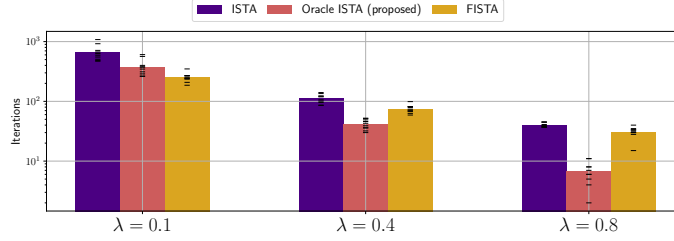

Figure D.2: Comparison between ISTA, FISTA and Oracle-ISTA for different levels of regularization on a Gaussian dictionary, with  $n = 100$  and  $m = 200$ . We report the average number of iterations taken to reach a point  $z$  such that  $F_x(z) < F_x^* + 10^{-13}$ . The experiment is repeated 10 times, starting from random points in  $\mathcal{B}_\infty$ . OISTA is always faster than ISTA, and is faster than FISTA for high regularization.

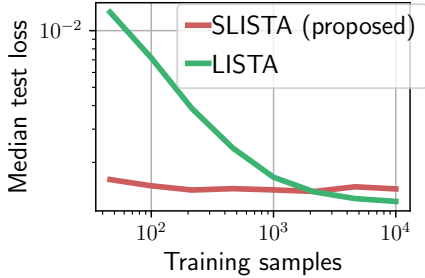

Figure D.3: Learning curves of SLISTA and LISTA. Random Gaussian dictionaries with  $n = 10$  and  $m = 20$  are generated. We take  $\lambda = 0.3$ . Networks with 10 layers are fit on those dictionaries, and their test loss is reported for different number of training samples. The process is repeated 100 times; the curves shown display the median of the test-loss.
